# Supplementary material
Source: publisher site journal article supplement (https://www.dovepress.com/article/221908)
Supplement: Supplementary file 1 [file get_supplementary_file.php]

Supplementary materialAppendix 1

***Interview guide***

Warm up question: What was it like to get here today?

**Main questions**

1) How did you, as a parent, *experience* (child´s name)´s assessment by the specialist team at XXX? How did you *experience* the interventions and the support that was provided after the assessment?

2) Was (child´s name) / you or your family *affected* by the assessment and the interventions in any way?

a) How did the assessment / interventions affect (child´s name)?

b) How did the assessment / interventions *affect you as a parent*?

c) How did the interventions / support you received *affect your family*?

3) In what ways did the assessment / interventions lead to *consequences* on the part of yourself/ your child/your family?

4) *What, if anything, would you have changed or wanted to be different,* in terms of the assessment process or the interventions provided by the specialist team?

**Additional questions (if needed)**

Questions about the assessment process:

If you try to remember, what was it like back then, when (child´s name) started all this?

What was the reason for him / her to meet with the assessment team?

What was it like, the first time you met with the assessment team?

What did you think, in the beginning?

What do you remember about the assessment process?

What did you expect?

How did you experience the different parts of the assessment?

What did you think when the assessment was completed?

What was it like, after the assessment was completed? How did you feel?

Questions about the interventions and support provided:

What kind of support was provided for you and (child´s name), after the assessment?

Tell me about the different kind of interventions or support that you and (child´s name) have received from the specialist team, since the assessment?

How has this all been for (child´s name), do you think?

What has it been like for you, his/her Mum/Dad?

What has changed during this time-period, for (child´s name), for you or your family?

In what ways have the interventions or the support provided affected your parenting?

Has the assessment, interventions or the support provided been a negative experience? How?

Questions about the interview:

Out of everything you´ve told me during this interview, what has been the most important?

Is there something else you would like to add?

Follow-up questions:

How? In what way? Tell me more about …? Can you give me an example of…?
